# Supplementary material
Source: Springer Nature journal article supplement (https://www.springermedizin.de/resource/supplementary/12974_2011_449_MOESM5_ESM.pdf/9601328)

Adult

Aged Intact

Aged Impaired

Hoechst

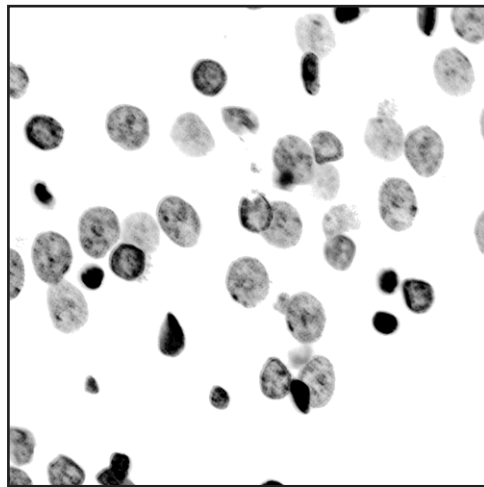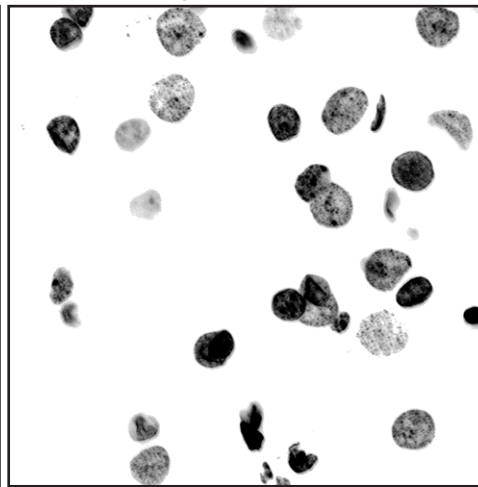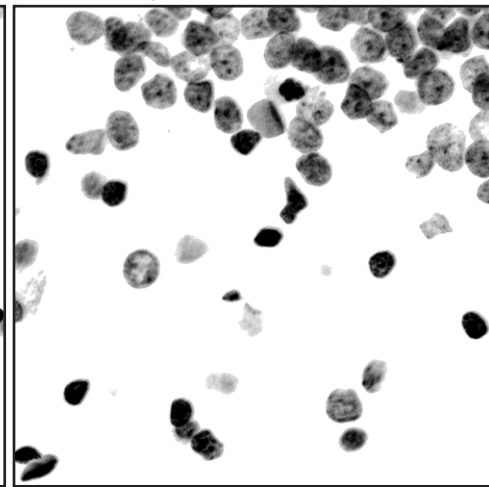

GFAP

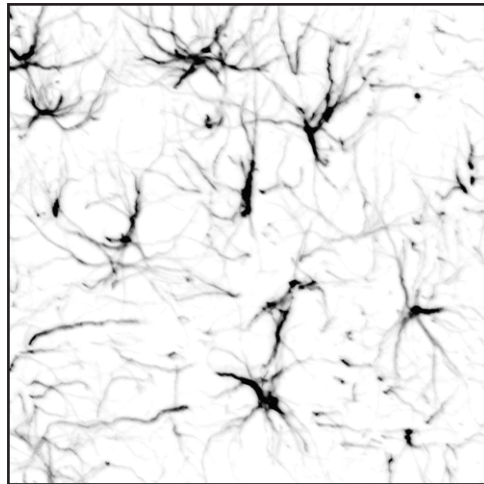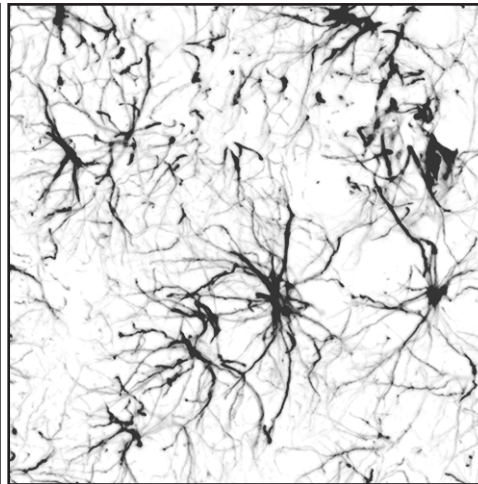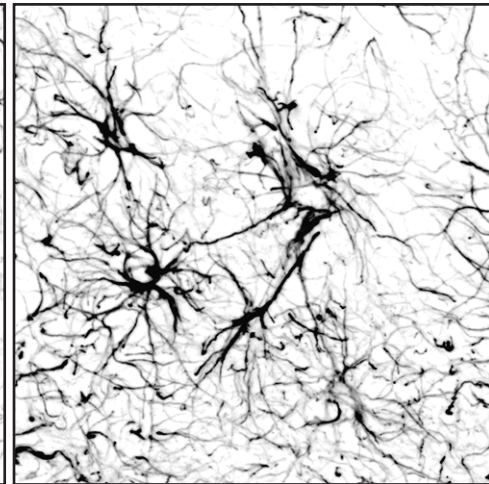

overlay

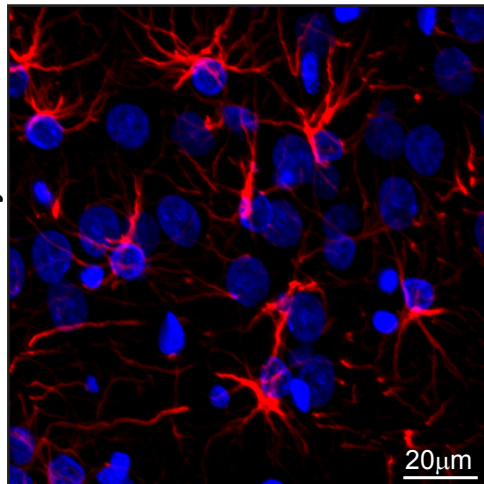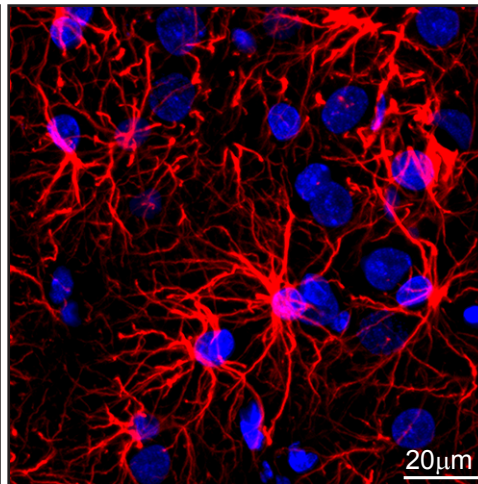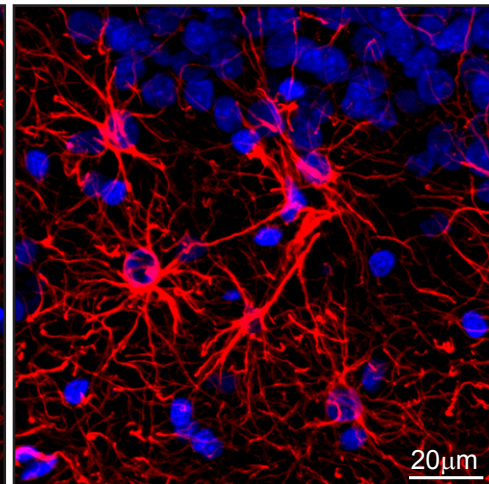

Supplement: MOESM5 [file 9601328]
